# Supplementary material for: Abnormal and Changing Information Interaction in Adults with Attention-Deficit/Hyperactivity Disorder Based on Network Motifs
Source: MDPI journal article supplement (doi:10.3390/brainsci13091331), 2023-09-15
Supplement: s1 [file s1]

## Supplementary Materials for

### Abnormal and changing information interaction in adults with attention-deficit/hyperactivity disorder

#### based on network motifs

#### 1. Supplementary tables

**Table S1** Mapping between ROIs and experiential function networks in AAL template.

| ROI | Regions              | RSN          | ROI | Regions           | RSN         | ROI | Regions              | RSN          |
|-----|----------------------|--------------|-----|-------------------|-------------|-----|----------------------|--------------|
| 1   | Precentral_L         | DMN          | 31  | Cingulum_Ant_L    | DMN         | 61  | Parietal_Inf_L       | Attention    |
| 2   | Precentral_R         | DMN          | 32  | Cingulum_Ant_R    | DMN         | 62  | Parietal_Inf_R       | Attention    |
| 3   | Frontal_Sup_L        | DMN          | 33  | Cingulum_Mid_L    | Subcortical | 63  | SupraMarginal_L      | Sensorimotor |
| 4   | Frontal_Sup_R        | DMN          | 34  | Cingulum_Mid_R    | Subcortical | 64  | SupraMarginal_R      | Sensorimotor |
| 5   | Frontal_Sup_Orb_L    | DMN          | 35  | Cingulum_Post_L   | DMN         | 65  | Angular_L            | Attention    |
| 6   | Frontal_Sup_Orb_R    | DMN          | 36  | Cingulum_Post_R   | DMN         | 66  | Angular_R            | Attention    |
| 7   | Frontal_Mid_L        | Attention    | 37  | Hippocampus_L     | Subcortical | 67  | Precuneus_L          | DMN          |
| 8   | Frontal_Mid_R        | Attention    | 38  | Hippocampus_R     | Subcortical | 68  | Precuneus_R          | DMN          |
| 9   | Frontal_Mid_Orb_L    | Attention    | 39  | ParaHippocampal_L | Subcortical | 69  | Paracentral_Lobule_L | Sensorimotor |
| 10  | Frontal_Mid_Orb_R    | Attention    | 40  | ParaHippocampal_R | Subcortical | 70  | Paracentral_Lobule_R | Sensorimotor |
| 11  | Frontal_Inf_Oper_L   | Attention    | 41  | Amygdala_L        | Subcortical | 71  | Caudate_L            | Subcortical  |
| 12  | Frontal_Inf_Oper_R   | Attention    | 42  | Amygdala_R        | Subcortical | 72  | Caudate_R            | Subcortical  |
| 13  | Frontal_Inf_Tri_L    | Attention    | 43  | Calcarine_L       | Visual      | 73  | Putamen_L            | Subcortical  |
| 14  | Frontal_Inf_Tri_R    | Attention    | 44  | Calcarine_R       | Visual      | 74  | Putamen_R            | Subcortical  |
| 15  | Frontal_Inf_Orb_L    | Attention    | 45  | Cuneus_L          | Visual      | 75  | Pallidum_L           | Subcortical  |
| 16  | Frontal_Inf_Orb_R    | Attention    | 46  | Cuneus_R          | Visual      | 76  | Pallidum_R           | Subcortical  |
| 17  | Rolandic_Oper_L      | Sensorimotor | 47  | Lingual_L         | Visual      | 77  | Thalamus_L           | Subcortical  |
| 18  | Rolandic_Oper_R      | Sensorimotor | 48  | Lingual_R         | Visual      | 78  | Thalamus_R           | Subcortical  |
| 19  | Supp_Motor_Area_L    | Attention    | 49  | Occipital_Sup_L   | Visual      | 79  | Heschl_L             | Sensorimotor |
| 20  | Supp_Motor_Area_R    | Sensorimotor | 50  | Occipital_Sup_R   | Visual      | 80  | Heschl_R             | Sensorimotor |
| 21  | Olfactory_L          | Subcortical  | 51  | Occipital_Mid_L   | Visual      | 81  | Temporal_Sup_L       | Sensorimotor |
| 22  | Olfactory_R          | DMN          | 52  | Occipital_Mid_R   | Visual      | 82  | Temporal_Sup_R       | Sensorimotor |
| 23  | Frontal_Sup_Medial_L | DMN          | 53  | Occipital_Inf_L   | Visual      | 83  | Temporal_Pole_Sup_L  | Attention    |
| 24  | Frontal_Sup_Medial_R | DMN          | 54  | Occipital_Inf_R   | Visual      | 84  | Temporal_Pole_Sup_R  | Sensorimotor |
| 25  | Frontal_Mid_Orb_L    | DMN          | 55  | Fusiform_L        | Visual      | 85  | Temporal_Mid_L       | DMN          |

|    |                   |                |    |                |                |    |                     |             |
|----|-------------------|----------------|----|----------------|----------------|----|---------------------|-------------|
| 26 | Frontal_Mid_Orb_R | DMN            | 56 | Fusiform_R     | Visual         | 86 | Temporal_Mid_R      | DMN         |
| 27 | Rectus_L          | DMN            | 57 | Postcentral_L  | Sensorimotor_r | 87 | Temporal_Pole_Mid_L | Subcortical |
| 28 | Rectus_R          | DMN            | 58 | Postcentral_R  | Sensorimotor_r | 88 | Temporal_Pole_Mid_R | Subcortical |
| 29 | Insula_L          | Sensorimotor_r | 59 | Parietal_Sup_L | Sensorimotor_r | 89 | Temporal_Inf_L      | Attention   |
| 30 | Insula_R          | Sensorimotor_r | 60 | Parietal_Sup_R | Sensorimotor_r | 90 | Temporal_Inf_R      | DMN         |

**Table S2** Brain regions showing significant differences based on node roles.

| <b>Role</b> | <b>ROI</b> | <b>Name</b>       | <b>Network</b> | <b>p(FDR)</b> | <b>ADHD(SD)</b> | <b>NC(SD)</b>  |
|-------------|------------|-------------------|----------------|---------------|-----------------|----------------|
| DPP         | 1          | Precentral_L      | DMN            | 0.003         | 138.35(172.63)  | 260.12(212.59) |
| DPP         | 38         | Hippocampus_R     | Subcortical    | 0.007         | 197.28(218.65)  | 117.04(158.30) |
| DPP         | 42         | Amygdala_R        | Subcortical    | 0.012         | 214.90(291.60)  | 101.56(138.46) |
| DPP         | 67         | Precuneus_L       | DMN            | 0.03          | 236.78(225.62)  | 436.96(448.27) |
| PPR         | 13         | Frontal_Inf_Tri_L | Attention      | 0.014         | 150.66(148.59)  | 76.66(67.66)   |
| PPR         | 48         | Lingual_R         | Visual         | 0.045         | 107.40(73.47)   | 187.12(167.18) |
| PPR         | 72         | Caudate_R         | Subcortical    | 0.04          | 117.33(114.4)   | 213.56(238.34) |
| PPR         | 89         | Temporal_Inf_L    | Attention      | 0.033         | 117.71(103.07)  | 173.64(135.84) |
| PPO         | 17         | Rolandic_Oper_L   | Sensorimotor   | 0.045         | 113.52(88.51)   | 165.82(142.18) |
| PPO         | 79         | Heschl_L          | Sensorimotor   | 0.045         | 118.61(92.04)   | 176.92(137.08) |

**Table S3** The directional edges of node roles with significant differences between brain regions.

| <b>ROLE</b> | <b>ROI</b> | <b>Name</b>       | <b>Link</b>  | <b>ROI</b> | <b>Name</b>         | <b>Network</b>             | <b>P - value</b> |
|-------------|------------|-------------------|--------------|------------|---------------------|----------------------------|------------------|
| DPP         | 1          | Precentral_L      | bidirection  | 43         | Calcarine_L         | DMN- Visual                | 0.009            |
| DPP         | 1          | Precentral_L      | bidirection  | 67         | Precuneus_L         | DMN-DMN                    | 0.006            |
| DPP         | 1          | Precentral_L      | bidirection  | 89         | Temporal_Inf_L      | DMN- Attention             | 0.006            |
| DPP         | 67         | Precuneus_L       | bidirection  | 4          | Frontal_Sup_R       | DMN- DMN                   | 0.009            |
| DPP         | 67         | Precuneus_L       | bidirection  | 80         | Heschl_R            | DMN- Sensorimotor          | 0.014            |
| DPP         | 38         | Hippocampus_R     | bidirection  | 42         | Amygdala_R          | Subcortical - Subcortical  | 0.0001           |
| DPP         | 38         | Hippocampus_R     | bidirection  | 73         | Putamen_L           | Subcortical - Subcortical  | 0.04             |
| DPP         | 38         | Hippocampus_R     | bidirection  | 76         | Pallidum_R          | Subcortical - Subcortical  | 0.011            |
| DPP         | 42         | Amygdala_R        | bidirection  | 40         | ParaHippocampal_R   | Subcortical - Subcortical  | 0.028            |
| DPP         | 42         | Amygdala_R        | bidirection  | 73         | Putamen_L           | Subcortical - Subcortical  | 0.017            |
| PPR         | 13         | Frontal_Inf_Tri_L | unidirection | 41         | Amygdala_L          | Attention - Subcortical    | 0.002            |
| PPR         | 48         | Lingual_R         | unidirection | 83         | Temporal_Pole_Sup_L | Visual - Attention         | 0.011            |
| PPR         | 72         | Caudate_R         | unidirection | 14         | Frontal_Inf_Tri_R   | Subcortical - Attention    | 0.031            |
| PPR         | 89         | Temporal_Inf_L    | unidirection | 30         | Insula_R            | Attention - Sensorimotor   | 0.033            |
| PPO         | 17         | Rolandic_Oper_L   | unidirection | 33         | Cingulum_Mid_L      | Sensorimotor - Subcortical | 0.0002           |
| PPO         | 17         | Rolandic_Oper_L   | unidirection | 34         | Cingulum_Mid_R      | Sensorimotor - Subcortical | 0.0005           |
| PPO         | 79         | Heschl_L          | unidirection | 1          | Precentral_L        | Sensorimotor -DMN          | 0.0007           |
| PPO         | 79         | Heschl_L          | unidirection | 33         | Cingulum_Mid_L      | Sensorimotor - Subcortical | 0.0005           |

**Table S4** Brain regions showing variation trend among node roles.

| <b>ROI</b> | <b>Name</b>         | <b>Network</b> | <b>NC</b> | <b>Role Weight</b> | <b>To</b> | <b>ADHD</b> | <b>Role Weight</b> |
|------------|---------------------|----------------|-----------|--------------------|-----------|-------------|--------------------|
| 52         | Lingual_R           | Visual         | DPP       | 0.44               | →         | PPR         | 0.41               |
| 63         | Precuneus_R         | Sensorimotor   | DPP       | 0.43               | →         | PPR         | 0.41               |
| 77         | Caudate_L           | Subcortical    | DPP       | 0.44               | →         | PPO         | 0.43               |
| 78         | Caudate_R           | Subcortical    | DPP       | 0.43               | →         | PPO         | 0.42               |
| 89         | Temporal_Pole_Sup_L | Attention      | DPP       | 0.45               | →         | PPR         | 0.41               |

**Table S5** Brain regions showing significant correlations with ASRS scores.

| DPP role-degree |             |       |       | PPR role-degree |           |        |       |
|-----------------|-------------|-------|-------|-----------------|-----------|--------|-------|
| ID              | Network     | r     | P     | ID              | Network   | r      | P     |
| 38              | Subcortical | 0.293 | 0.006 | 13              | Attention | 0.228  | 0.033 |
| 42              | Subcortical | 0.346 | 0.001 | 48              | Visual    | -0.206 | 0.043 |

## 2. Supplementary results

In order to ensure the consistency of recognition motifs in the ADHD dataset, we detected each threshold of the AAL atlas and Power atlas, respectively (threshold ranging from 0.1 to 0.4 with a partition interval of 0.05). We identified motif patterns of groups and found that when the threshold was 30%, the population proportion of all kinds of network motifs in the two groups reached the maximum and remained stable. The specific situation is shown in Supplementary Figure S1 and Figure S2.

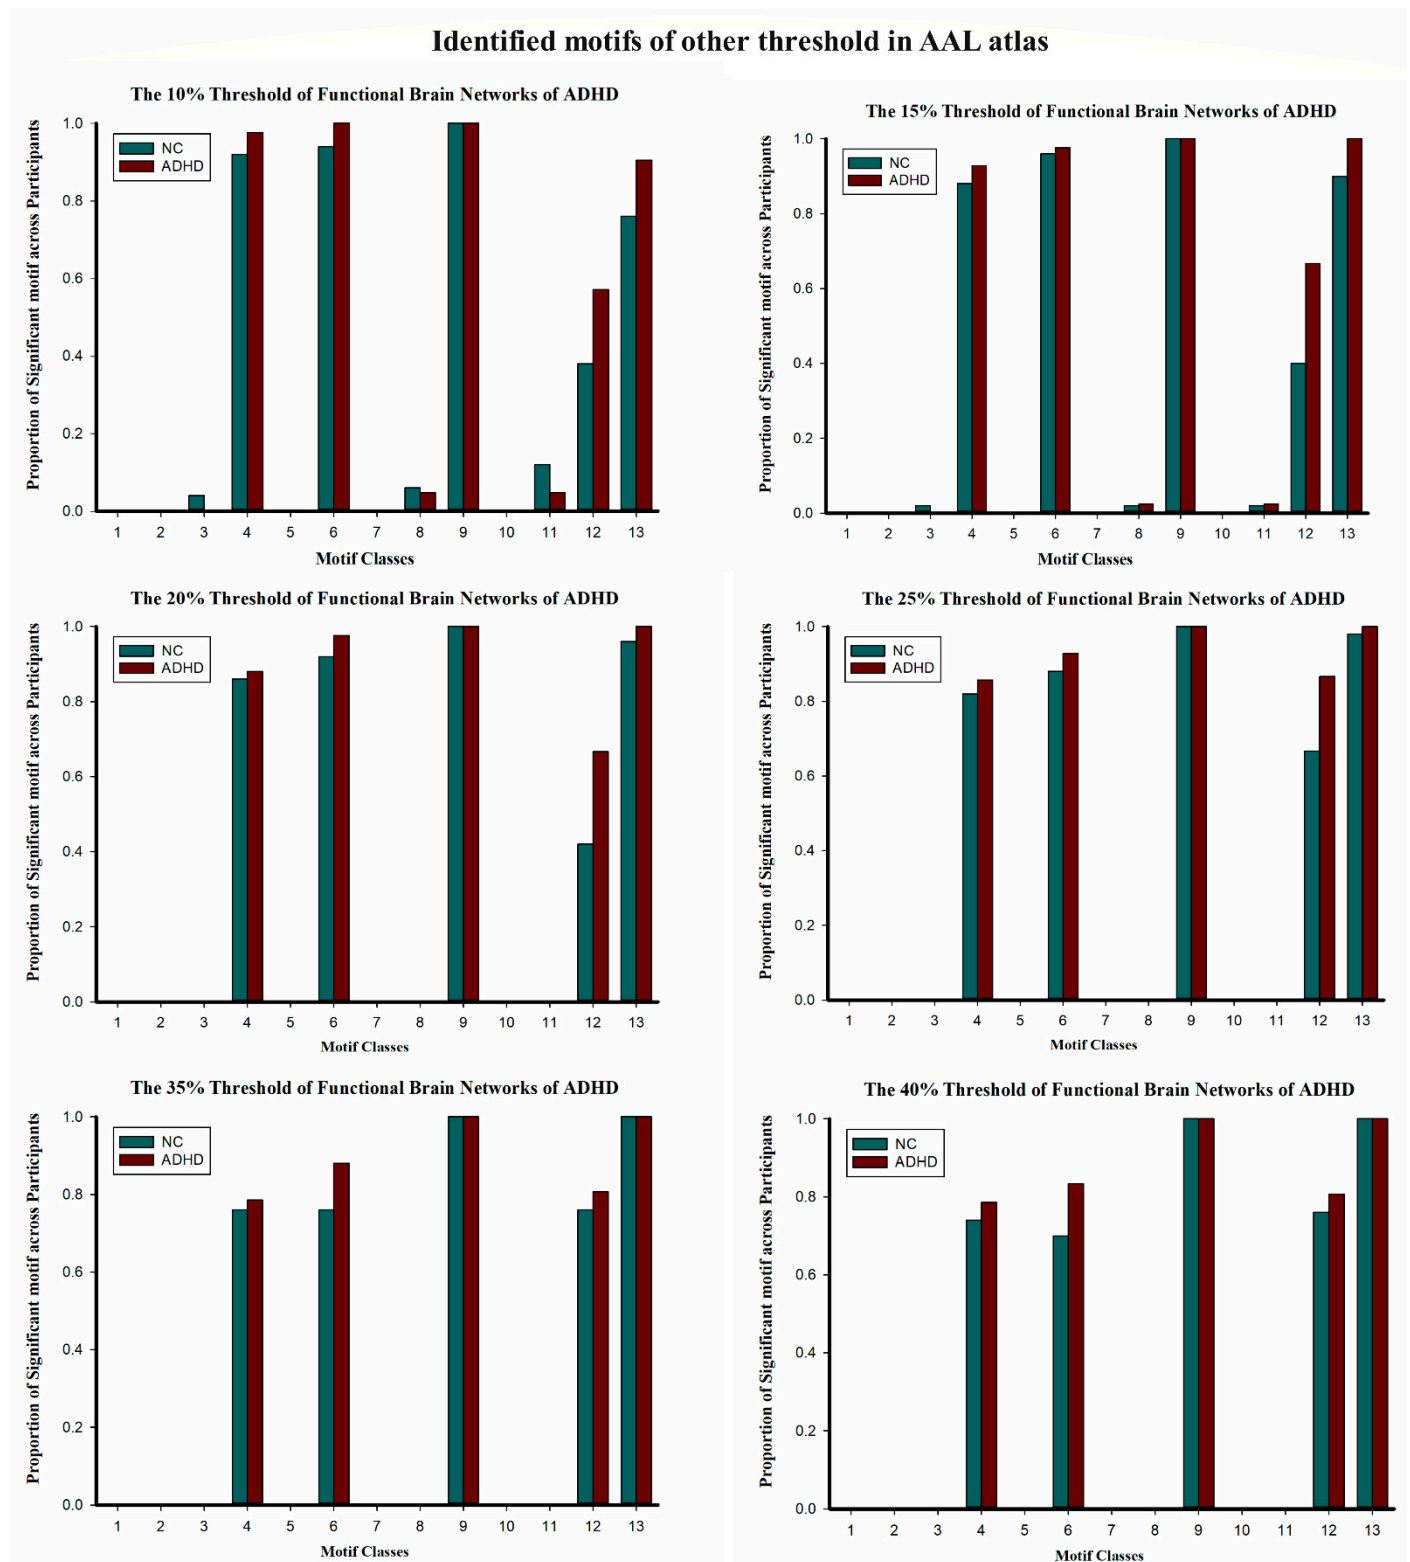

**Supplementary Figure S1.** The results of identified motifs in each threshold about AAL atlas.

## Identified motifs of other threshold in Power atlas

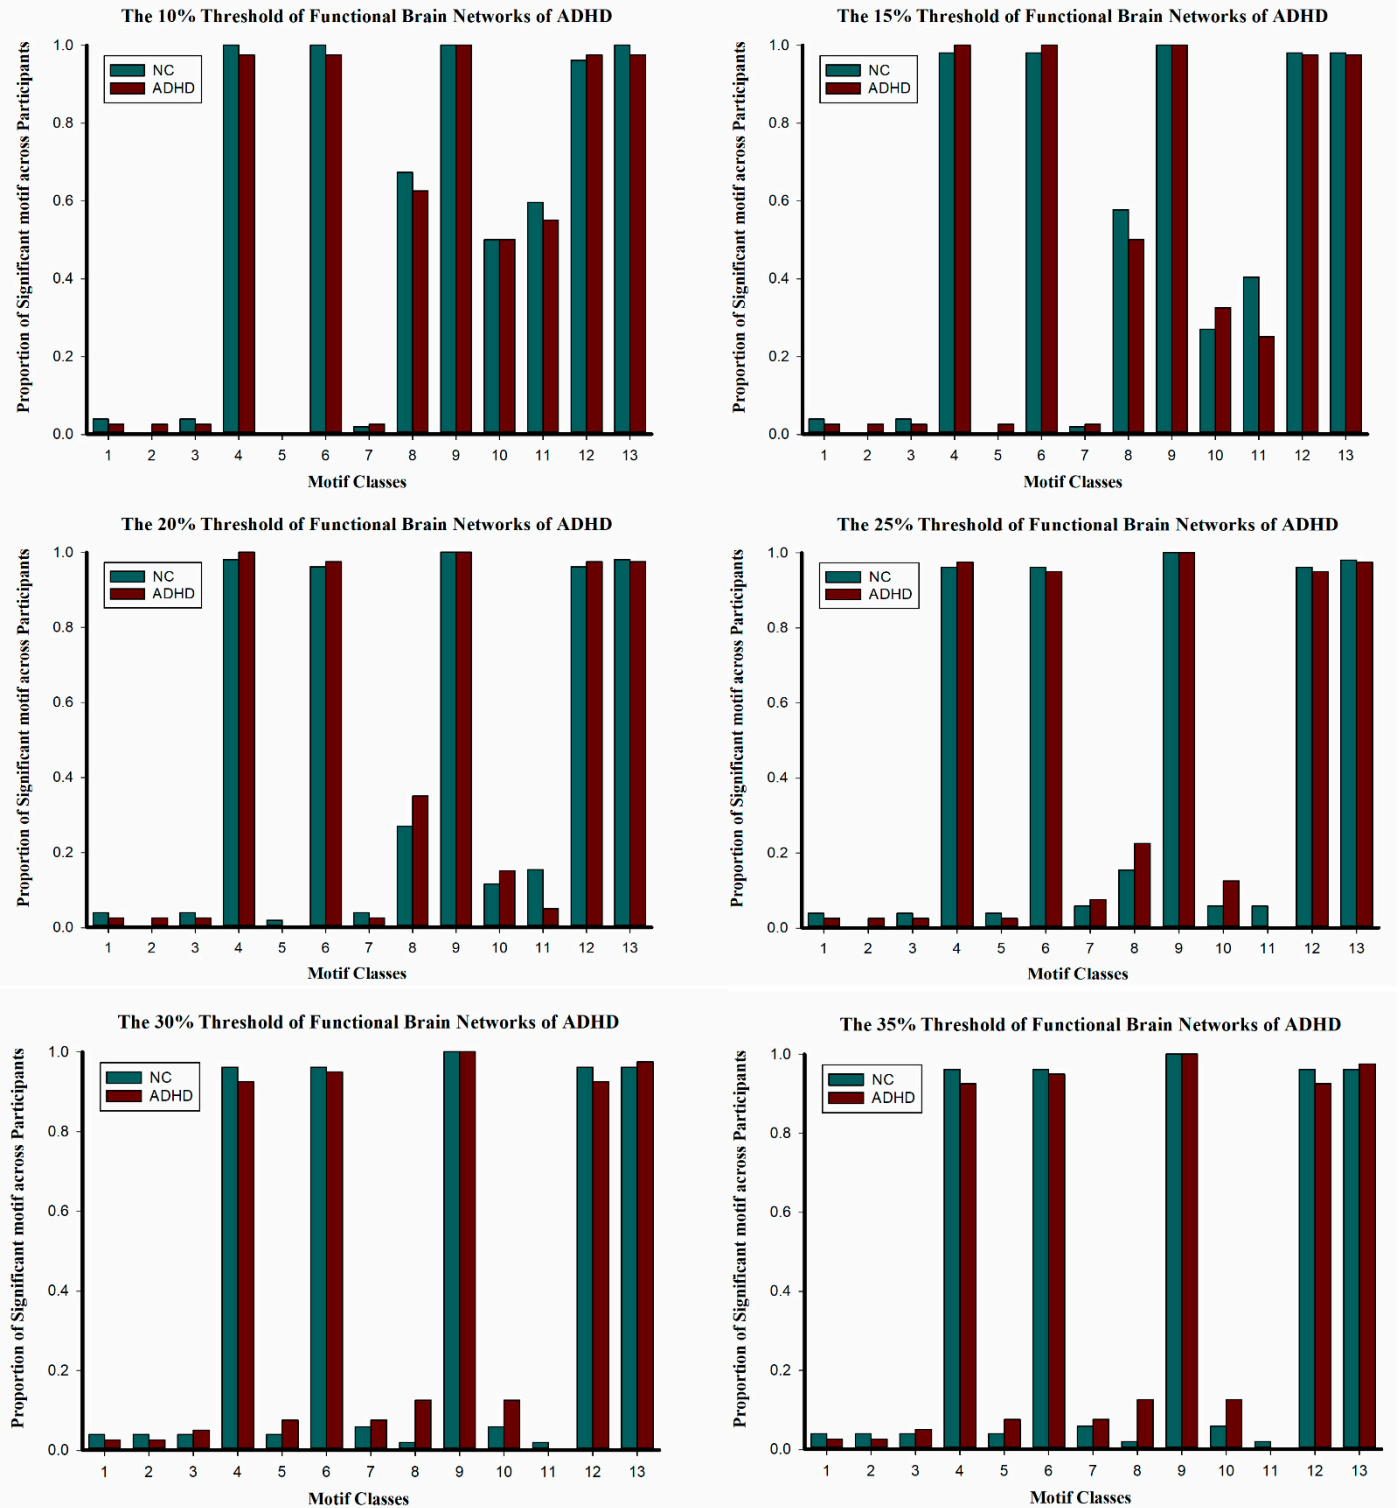

**Supplementary Figure S2.** The results of identified motifs in each threshold about Power atlas.

To investigate the relationship between node degree and role-degree in brain functional network, we used Pearson's correlation to measure. We found that, in two groups of subjects, DPP role is highly correlation with node total-degree, in-degree and out-degree. The PPR role is highly correlation with in-degree node ( $r(\text{NC})=0.8843$ ,  $r(\text{ADHD})=0.8844$ ,  $p<0.0001$ ), and PPO role with out-degree node ( $r(\text{NC})=0.8541$ ,  $r(\text{ADHD})=0.8569$ ,  $p<0.0001$ ). It indicates that each kind of node role plays a different function in information interaction. The larger the node role-degree, the stronger the information interaction ability it represents. The specific situation is shown in Supplementary Figure S3.



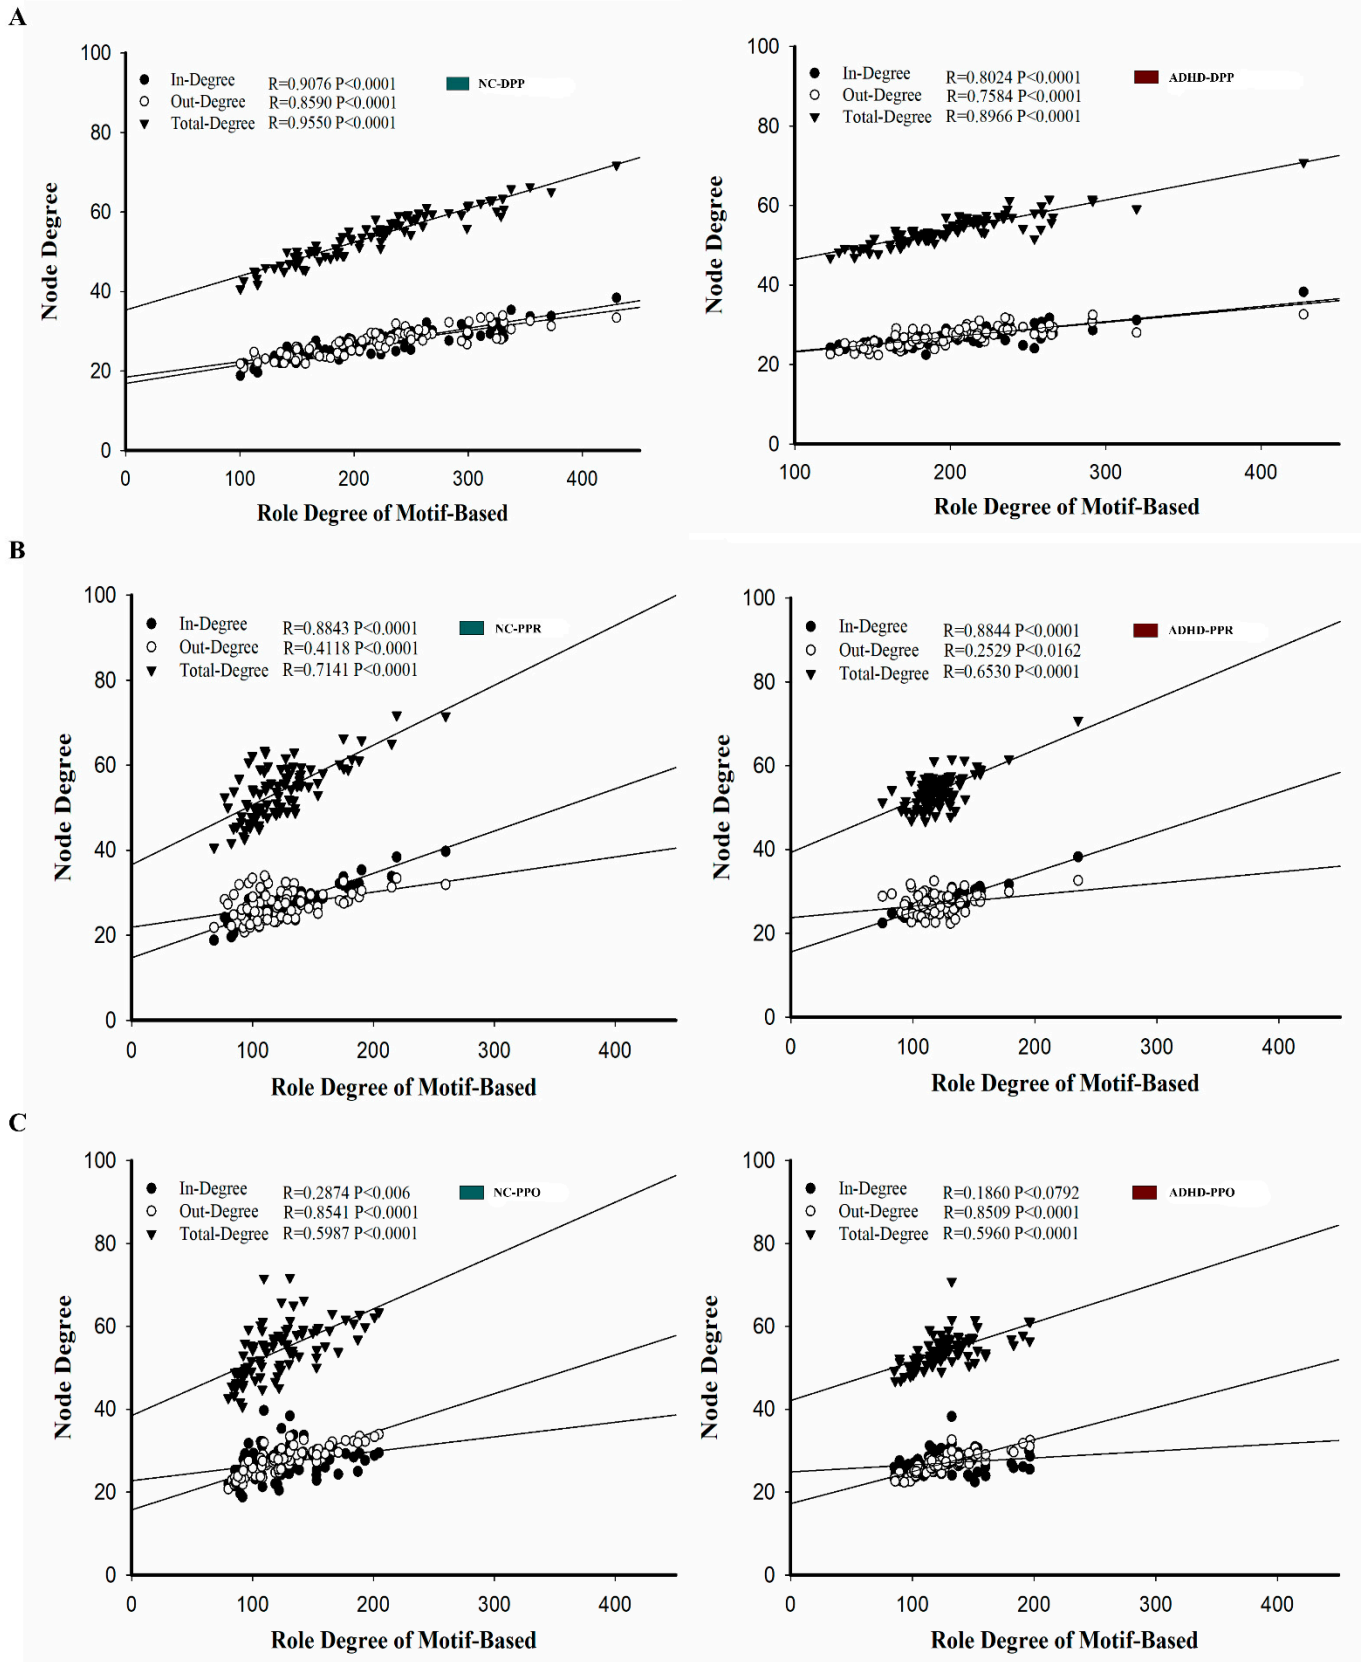

**Supplementary Figure S3.** The correlation between node degree(in-degree/out-degree) and motif-based role-degree.

### 3. Supplementary method

The calculation process of the model order  $p$ :

For the multivariate autoregressive (MVAR) model order  $p$ , values too small can lead to a poor representation of the data, whereas values too large can lead to problems of model estimation. Therefore, we used the Akaike information criterion (AIC) and

Bayesian information criterion (BIC) to select the optimal model order  $p$ . For  $n$  variables:

$$AIC(p) = \ln(\det(\Sigma)) + \frac{2pn^2}{T} \quad (S1)$$

$$BIC(p) = \ln(\det(\Sigma)) + \frac{\ln(T)pn^2}{T} \quad (S2)$$

where  $\Sigma$  is the noise covariance matrix of the restricted model, and  $T$  is the time-series length. The results showed that, regardless of whether AIC or BIC was used, the error noise was the smallest when the model order  $p$  was set to 1.

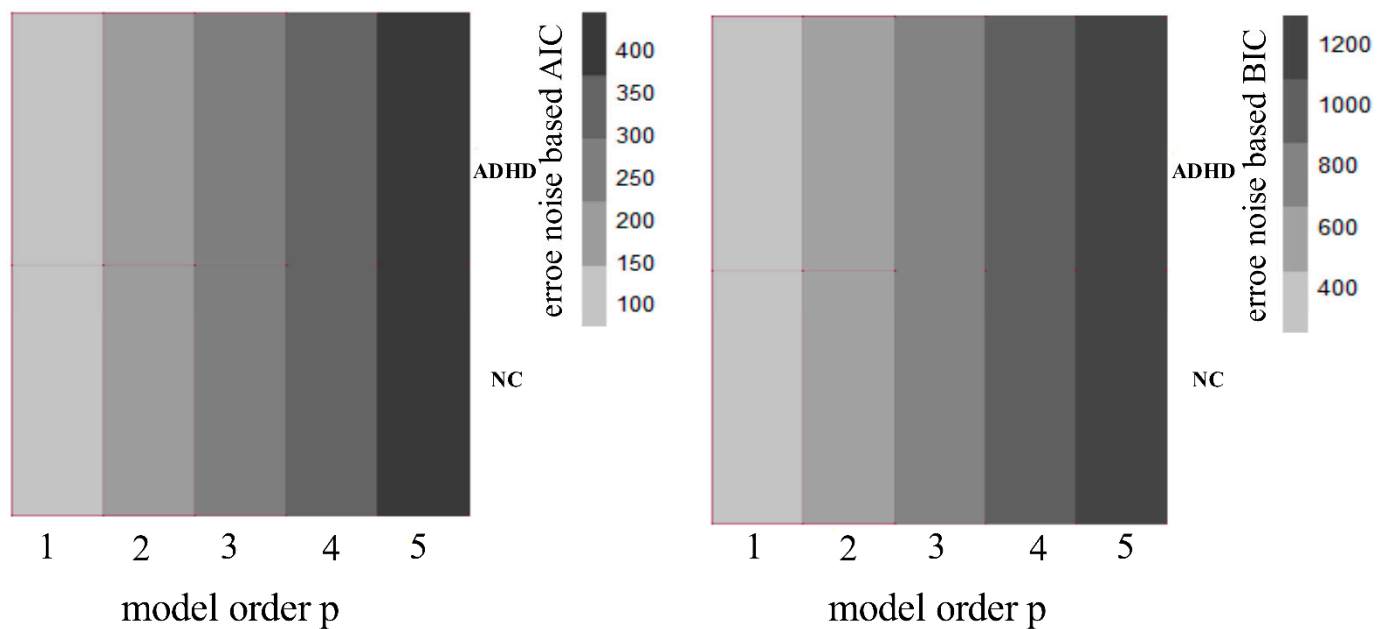

**Supplementary Figure S4.** The model order  $p$  of parameter optimization.
